# Supplementary material for: Long-term single-cell passaging of human iPSC fully supports pluripotency and high-efficient trilineage differentiation capacity
Source: PubMed Central journal article supplement — SAGE Open Med. 2020 Oct 22;8:2050312120966456. doi: 10.1177/2050312120966456 (PMC7586033; doi:10.1177/2050312120966456), 2020-10-22
Supplement: SOM-20-0113-R2_SupMaterial_revised_version_FINAL.pdf [file SOM-20-0113-R2_SupMaterial_revised_version_FINAL.pdf]

# Long-term single cell passaging of human iPSC fully supports pluripotency and high-efficient trilineage differentiation capacity

Estela Cruvinel<sup>1,¶</sup>, Isabella Oigusuku<sup>1,¶</sup>, Rosanna Cerioni<sup>1</sup>, **Sirlene Rodrigues<sup>1</sup>**, Jéssica Gonçalves<sup>1</sup>, Maria Elisa Góes<sup>2</sup>, Juliana Morais Alvim<sup>1</sup>, Anderson Carlos Silva<sup>3</sup>, Vanesca de Souza Lino<sup>5</sup>, Enrique Boccardo<sup>5</sup>, **Ernesto Goulart<sup>6</sup>**, Alexandre Pereira<sup>3</sup>, Rafael Dariolli,<sup>1,4</sup> Marcos Valadares<sup>1</sup>, Diogo Biagi<sup>1,\*</sup>

<sup>1</sup>PluriCell Biotech, São Paulo, 05508-000, Brazil

<sup>2</sup>Department of Biochemistry, Institute of Chemistry, University of São Paulo, São Paulo, Brazil

<sup>3</sup>Laboratory of Genetics and Molecular Cardiology, Hospital das Clinicas HCFMUSP, Faculdade de Medicina, Universidade de Sao Paulo, SP, 05403-900, Brazil.

<sup>4</sup>Department of Pharmacological Sciences, Icahn School of Medicine at Mount Sinai, New York, 10029, USA.

<sup>5</sup>Department of Microbiology, Institute of Biomedical Sciences, University of São Paulo, São Paulo 05508-900, Brazil.

**<sup>6</sup>Human Genome and Stem Cell Research Center, Department of Genetics and Evolutionary Biology, Institute of Biosciences, University of São Paulo, São Paulo, Brazil**

<sup>¶</sup>Both authors contributed equally to this work.

\*Corresponding author

E-mail: diogo.biagi@pluricellbiotech.com.br

Mailing address: 2242 Prof. Lineu Prestes Avenue, Sao Paulo, SP. 05508-000, Brazil.

Telephone number: +55 11 3039-8359

**Keywords:** human induced-pluripotent stem cells; hiPSC maintenance; hiPSC differentiation

## Karyotype

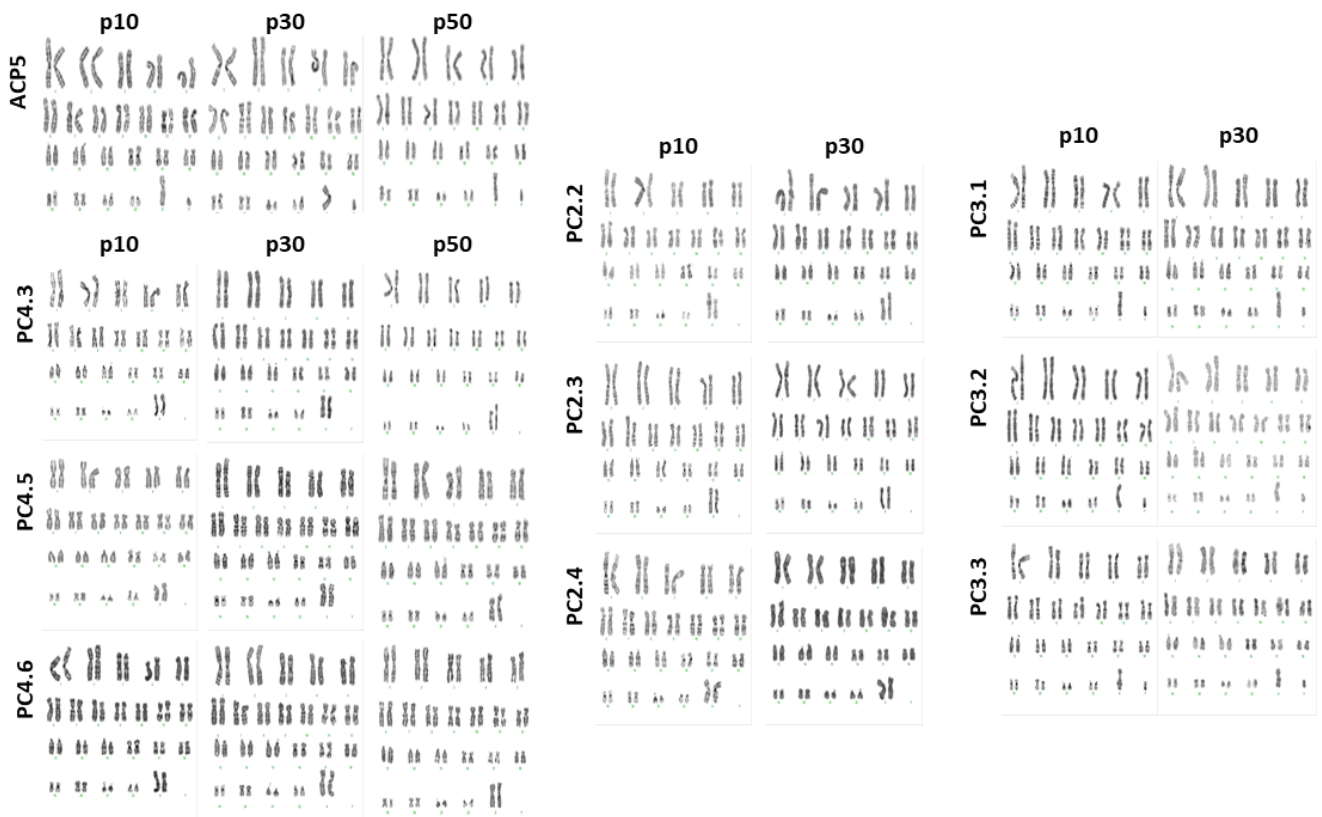

**S1 Figure. Karyotype confirmed absence of karyotypic abnormalities for all hiPSC clones.** G-Banding karyotype of hiPSC clones ACP5, PC2.2-2.4, PC3.1-3.3, PC4.3-4.6, after 10, 30 or 50 single-cell passages. No chromosomal abnormalities were observed.

## Integration PCR

ACP5 and PC4 clones were obtained by transfection with plasmids pEB-C5, pEB-TG (both used in ACP reprogramming) and Epi 5 (used in PC4 reprogramming). To check for any episomal integration into host DNA, we performed an integration PCR (S2 Figure) using three sets of primers (S1 Table) targeting specific sites of the plasmids in gDNA as described by Chou and colleagues<sup>1</sup>. As positive control we used each iPSC line respective plasmids at dilution ratios of 1:200 (pEB-C5), 1:20,000 (pEB-TG) and 1:500,000 (Epi5).

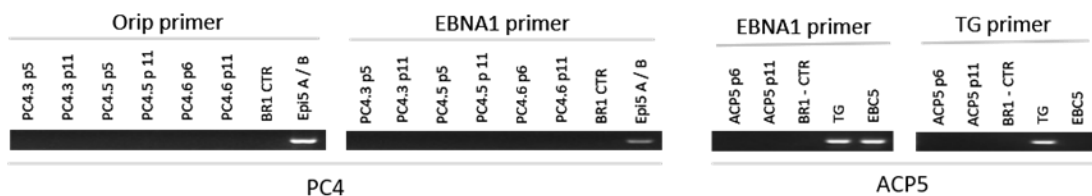

**S2 Figure. RT-PCR confirmed no vector integration into iPSC clones.** Integration PCR analysis confirmed no episomal integration into host DNA. As positive control for PC4 clones, we used plasmid Epi5 at a dilution of 1:500,000. For ACP5, plasmids pEB-C5 (1:200) and pEB-TG (1:20,000) were used. BR1 (hESC) was used as negative control.

## Flow cytometry and Immunofluorescence

Protein expression was analyzed by Flow Cytometry (FC) and Immunofluorescence (IF). hiPSCs were plated in 96-well plates coated with GELTREX and cultivated for 2 days for IF. Cells were fixed with 4% PFA, permeabilized with Triton 0.1% and Saponin 0.1% (both from Sigma Aldrich, EUA). Cells were stained with antibodies anti-OCT4, NANOG and TRA-1-60. Nuclei were stained using 1 µg/mL of Hoechst 33342 (Sigma Aldrich, EUA) (Figure S3). As for FC, (Figure S4) iPSC were grown until they reached 70-80% confluence and harvested with Versene. Next, cells were fixed and stained using Fluorescent Human ES/iPS Cell Characterization Kit (Merck Millipore Sigma, USA). Both procedures followed manufacturer's instructions.

Cardiomyocytes at the 30<sup>th</sup> day of differentiation were plated in 96-well plates coated with GELTREX and cultivated for 5 days for IF. Cells were also fixed as previously described. Next, cells were stained with antibodies anti-TNNI1, TNNI3, TNNT2, ACTN2, MYH7, and NKX2.5. For FC, cardiomyocytes were plated in 6-well plates coated with GELTREX and cultivated for 7 days. After cell dissociation, they were fixed with 1% PFA, permeabilized with Triton 0.1% and Saponin 0.1% (both from Sigma Aldrich, EUA) and stained with antibodies anti-TNNI1, TNNI3, TNNT2, ACTN2, and NKX2.5. Titration of antibodies was done until no staining was found in iPSC.

For IF, keratinocytes were plated in a 96-well plate, fixed with 4% PFA, permeabilized and blocked with 0.1% Triton X-100 and 10% fetal bovine serum (Thermo Fisher, USA). Then cells were stained with antibodies anti-K10, K14, Ki67, p63, and CD104. Nuclei were stained using 1 µg/mL of Hoechst 33342 (Sigma Aldrich, EUA). Image was generated in EVOS FL (Thermo Fisher, USA). As for FC, keratinocytes were fixed with 90% methanol ice cold solution and stained with Alexa488 conjugated anti-keratin 14 antibody for FC.

For definitive endoderm, at the end of day 3, cells were fixed and permeabilized as described previously for cardiomyocytes. Cells were stained with antibodies anti-FOXA2 and anti-CXCR4. For fluorescence visualization, cells were stained with Alexa 488 and Alexa647 Nuclei staining and image acquisition and performed as previously described. For FC, after cell dissociation, they were fixed with 1% PFA, permeabilized with Triton 0.1% and Saponin 0.1% and stained with antibodies anti-FOXA2. hiPSC-CM and hiPSC were used as negative control. To design the gates for positive events we used samples incubated exclusively with secondary antibodies. All FC data was acquired using Canto BD equipment and analyzed by FlowJo Software considering 1% of false positive events.

hiPSC were used as negative control for the reaction for definitive endoderm, keratinocytes and cardiomyocytes. As for the iPSC staining, fibroblasts were used as negative control. Further information about the antibodies used can be found in S3 Table.

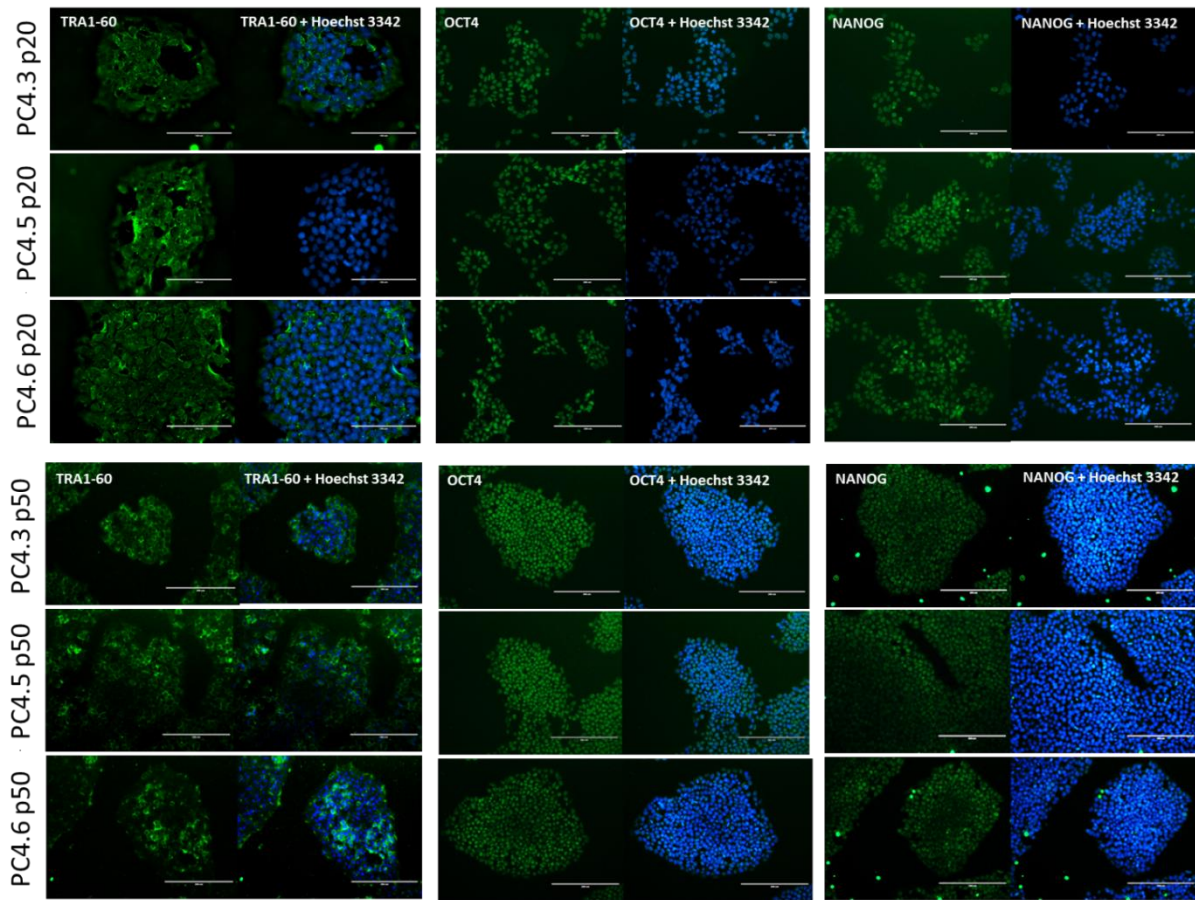

**S3 Figure. Immunocytochemistry confirmed expression of pluripotency markers at passages 20 and 50.** Immunostaining of clones PC4.3, PC4.5 and PC4.6 at passages 20 and 50 showing expression of pluripotency markers OCT4, NANOG (both nuclear) and TRA-1-60 (membranous).

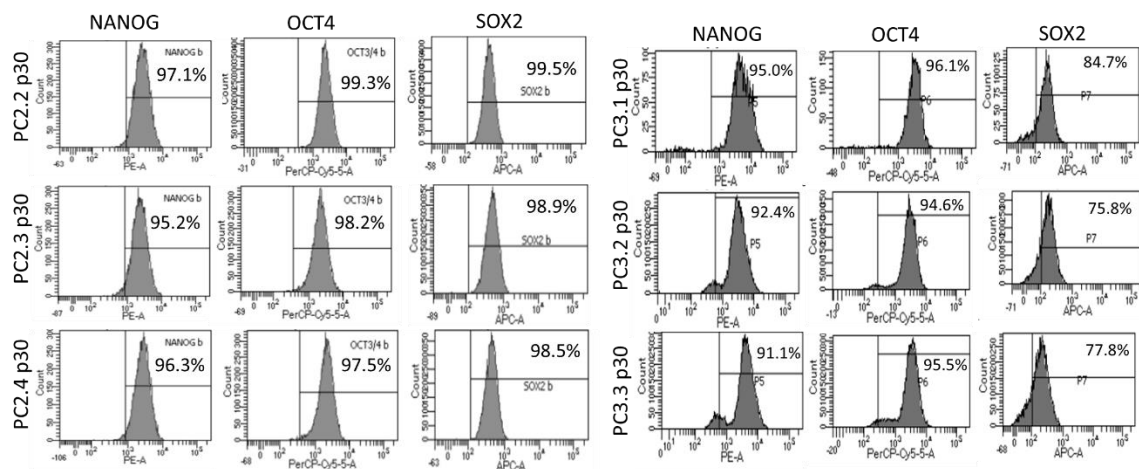

**S4 Figure. PC2 and PC3 clones preserved their pluripotency at high passages.** Flow cytometry results for pluripotency markers NANOG, OCT4 and SOX2 in clones PC2 and PC3 at passage 30.

## EB formation

EBs were generated using a hybrid protocol based on previous publication.<sup>2,3</sup> Briefly, hiPSCs were dissociated, centrifuged and resuspended at 80,000 cells/mL concentration. 25uL drops (with 2,000 cells each) were done at a petri dish lid; then the lid was carefully inverted and placed on the top of the dish containing 10mL of HBSS1x. After 48h, cell aggregates were collected and transferred to a low attachment 12-well plate (Sarstedt) with Essential 6 medium. Half of the medium was replaced every three days until day 13, when RNA was collected using Trizol (Thermo Fisher, USA). We performed an endpoint RT-PCR using differentiation markers *SOX17*, *MSX1* and *PAX6* (endo, meso, and ectoderm, respectively) and pluripotency marker *DNMT3B* and *NANOG*. As negative control, we used samples extracted from the respective iPSC clones at passage 20. PCR analysis showed that all the hiPSC clones generated EBs containing differentiated progeny of all three germ layers (Figure S5).

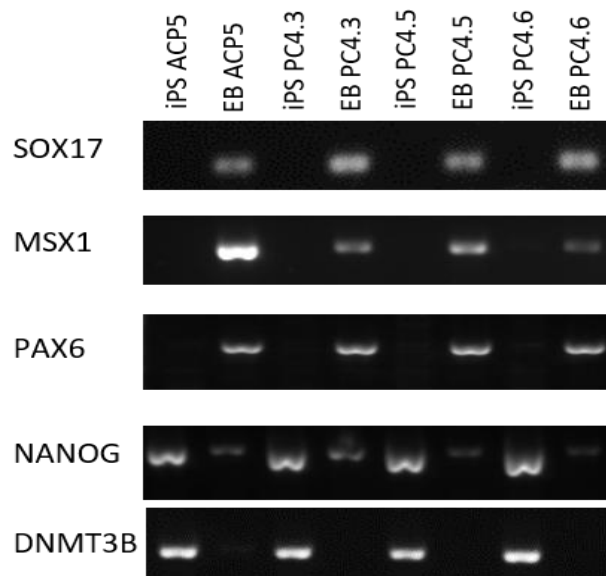

**S5 Figure. iPSC clones generated EBs containing differentiated progeny of all three germ layers.** Endpoint RT-PCR of EB showing expression of markers of derivatives lines from endoderm (*SOX17*), mesoderm (*MSX1*) and ectoderm (*PAX6*); and showing no expression of pluripotent markers *DNMT3B* and *NANOG*. *GAPDH* was used as housekeeping control.

## iPSC-derived keratinocytes calcium treatment

iPSCs at different passages (passage 25 to 50) were plated with mitomycin C-inactivated 3T3 cells (donation from Monica Mather's laboratory) at a 20% confluence. After 2 days, defined-KSFM medium (Thermo Fisher, USA) was supplemented with 10 ng/mL of BMP4 (R&D Systems, USA) and 1  $\mu$ M retinoic acid (Sigma Aldrich, USA) as described by Itoh and colleagues.<sup>4</sup> At day 4, cells were cultivated with fresh defined-KSFM medium

and, after 28 days of differentiation, iPSC-derived keratinocytes (iPSC-KC) were supplemented with 1  $\mu$ M CaCl for 7 days. Medium was exchanged every 2 to 3 days. After treatment with calcium, iPSC-KC were stained using epithelial specific markers K10 and K14. Immunofluorescence showed that after calcium treatment some K10-positive cells were found in all cell clones (S6 Figure).

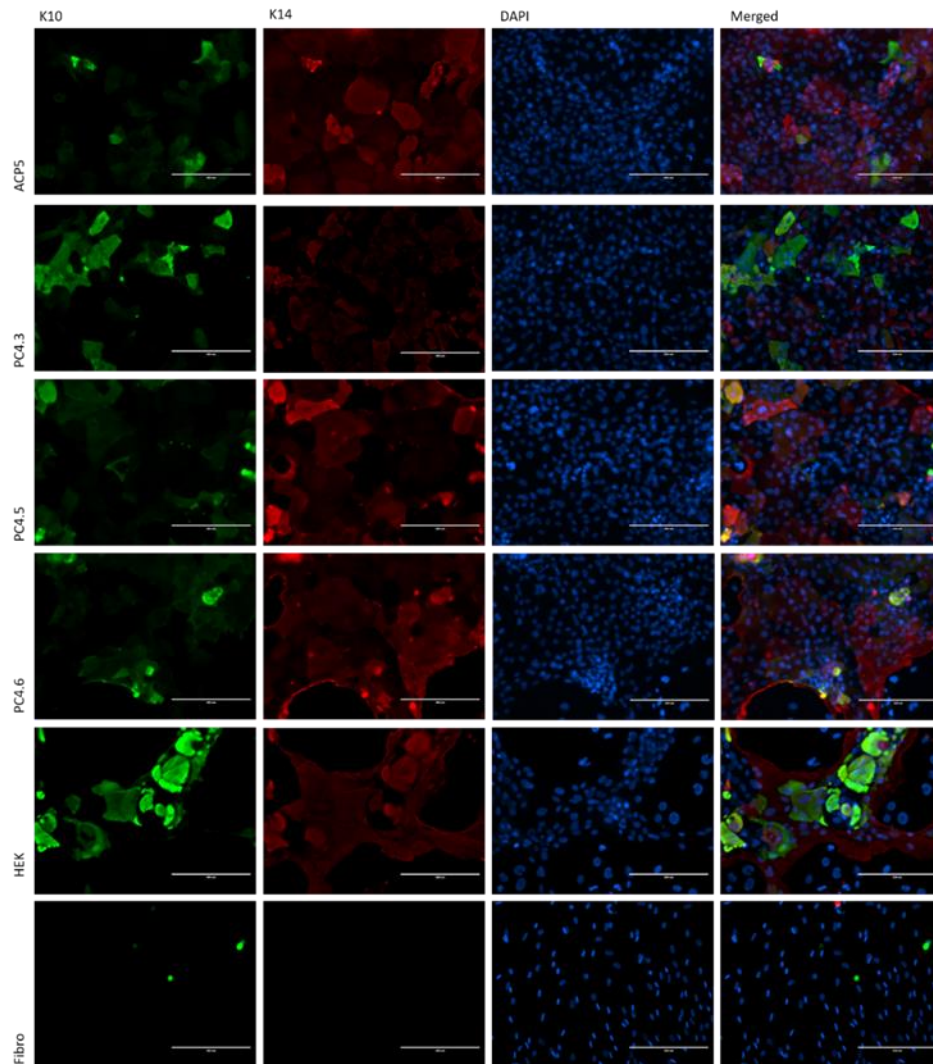

**S6 Figure. Immunostaining showed up-regulation of K-10 after calcium treatment for Keratinocytes derived from all iPSC clones.** Cell line HEK and original PC4 fibroblasts were used as positive and negative controls for the reaction, respectively.

### **iPSC-derived cardiomyocytes beating culture**

[Insert Video 1 - <https://youtu.be/T9JADZXXKfck> (40x magnification)]

[Insert Video 2 - <https://youtu.be/XL0ut0VpXTo> (100x magnification)]

**Supplementary Videos. Cardiomyocytes generated by long-term cultivating iPSC spontaneously beating.** Videos recorded at day 11 of differentiation, showing cardiomyocytes beating on monolayer. The software wondershare filmora was used to add legend and chronometer to the video and the codec (compression-decompression program) used was H.246.

## CellCountAnalyser

Cells confluence monitoring is a regular practice in a cell culturing laboratory. Nevertheless, visual monitoring can cause significant misinterpretations, especially considering different operators. Since the high-efficient protocols of differentiation using hiPSCs, in general, are dependent on the proliferative state of these cells, to keep them growing in log-phase seems to be a mandatory step for success.

In this regard, several groups have been proposing, from the simple to very complex, semi-automatic or automatic systems to measure cell confluence based on microscope imaging techniques.<sup>5-8</sup> Despite the advantages to monitor cell confluence by automated methods, significant issues associated to the quality of images obtained by optical microscopy from cell cultures can also cause some misinterpretation for impairing daily cell maintenance and differentiation protocols.

We have been monitoring cell confluence based on a modified version of the software previously proposed by Busschots et. al.<sup>8</sup> Despite the easy platform designed to be used in ImageJ software, we have found at least two important issues in this software, 1) there are too many steps to evaluate the confluence **spending** long time to reach final results and 2) there are significant misinterpretation of results, as higher as the confluence (S4 Table).

Considering these problems, we have created a “One-click Python-based platform” (named CellCountAnalyser) to automate the calculation of confluence in batches of images and also, we created a correction factor based on pre-fabricated images with known confluences from 0 to 100% (5% intervals, S7-A Figure). Based on the quantification of prefabricated images, a linear equation to correlates measured (by original software) vs. real expected confluences was generated. The implementation of the linear equation step generated a new corrected value for measured confluence closer to that visualized in the culture dishes (S7-B Figure and S5 Table). We also created a command line to generate an excel report with quantified confluences and mean  $\pm$  STD for all the class/name images. Additionally, an easy step-by-step user manual was written (S7-C Figure). The package with CellCountAnalyser is available to download in this article’s supplementary material.

Furthermore, five images with 100X magnification from predefined (and marked to be used in following days) areas of the center and borders of each plate were recorded and quantified daily to monitor cell confluence.

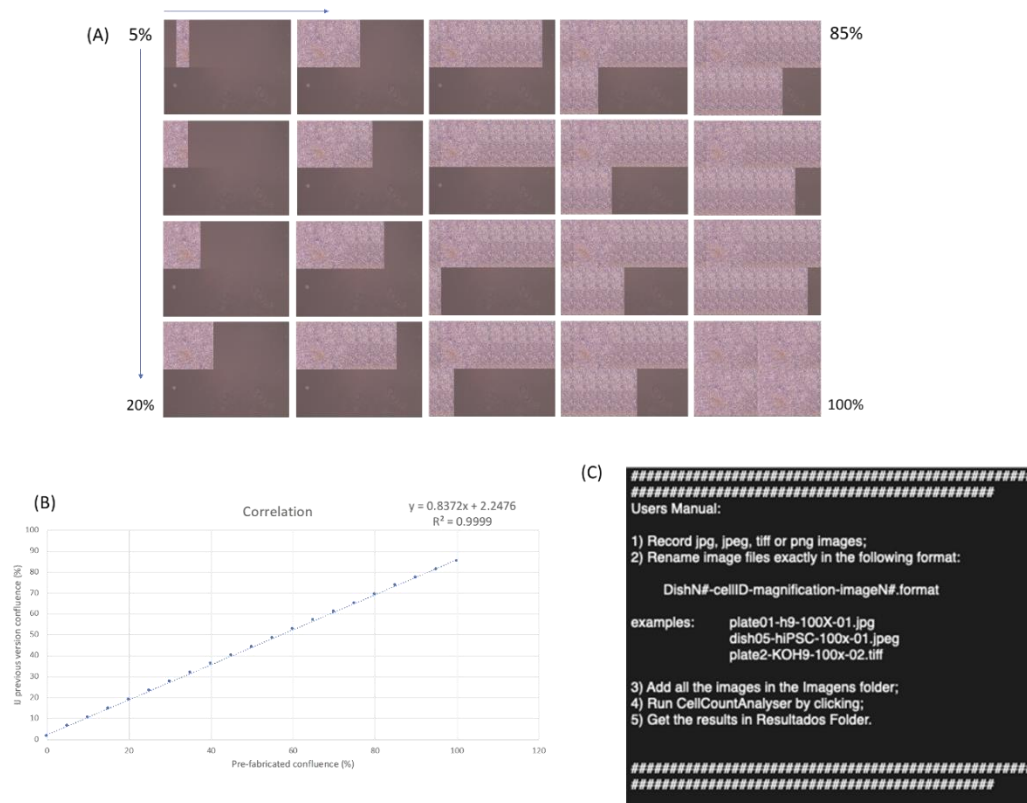

**S7 Figure. CellCountAnalyser yielded more accurate cell confluence predictions. A)** Set of pre-fabricated images with known confluences from 0-100%. **B)** Correlation of the confluences measured by the original software and the real values. **C)** CellCountAnalyser users manual.

**S1 Table. Set of primers used for Integration PCR**

| Primer               | Sequence                      |                   | Amplicon     |
|----------------------|-------------------------------|-------------------|--------------|
| EBNA1 <i>forward</i> | 5'-ATCGTCAAAGCTGCACACAG-3'    | pEB-C5,<br>pEB-Tg | Epi5, 666 bp |
| EBNA1 <i>reverse</i> | 5'-CCCAGGAGTCCCAGTAGTCA-3'    |                   |              |
| Orip <i>forward</i>  | 5'-TTCCACGAGGGTAGTGAACC-3'    | Epi5              | 544 bp       |
| Orip <i>reverse</i>  | 5'-TCGGGGGTGTTAGAGACAAC-3'    |                   |              |
| TG <i>forward</i>    | 5'-GCCAGGTGGGTTAAAGGAGC-3'    | pEB-Tg            | 127 bp       |
| TG <i>reverse</i>    | 5'-GGTACTTATAGTGGCTGGGCTGT-3' |                   |              |



**S2 Table. Set of primers used for RT-PCR and RT-qPCR**

| <b>Primer</b> |         | <b>Sequence</b>                   | <b>Amplicon</b> |
|---------------|---------|-----------------------------------|-----------------|
| DNMT3B        | Forward | 5'- ATAAGTCGAAGGTGCGTCGT -3'      | 203 bp          |
|               | Reverse | 5'- GGCAACATCTGAAGCCATTT -3'      |                 |
| NANOG         | Forward | 5'- CAGCCCTGATTCTTCCACCAGTCCC-3'  | 391 bp          |
|               | Reverse | 5'- TGGAAGGTTCCCAGTCGGGTTCCACC-3' |                 |
| MSX1          | Forward | 5'-CGAGAGGACCCCGTGGATGCAGAG-3'    | 307 bp          |
|               | Reverse | 5'-GGCGGCCATCTTCAGCTTCTCCAG-3'    |                 |
| PAX6          | Forward | 5'-GCCAGCAACACACCTAGTCA-3'        | 138 bp          |
|               | Reverse | 5'-TGTGAGGGCTGTGTCTGTTC-3'        |                 |
| SOX17         | Forward | 5'CAAGGGCGAGTCCC GTATC-3'         | 58bp            |
|               | Reverse | 5'GTCCTTAGCCCACACCATGA-3'         |                 |
| K5            | Forward | 5'ATCTCTGAGATGAACCGGATGATC-3'     | 75 bp           |
|               | Reverse | 5'-CAGATTGGCGCACTGTTTCTT -3'      |                 |
| K10           | Forward | 5'- GGGCTCTGGAAGAATCAAAC -3'      | 185 bp          |
|               | Reverse | 5'- ATTGTCGATCTGAAGCAGGA -3'      |                 |
| IVL           | Forward | 5'- TCCTCCTCCAGTCAATACCC -3'      | 181 bp          |
|               | Reverse | 5'- CTGTGGCTCCTTCTGCTGT -3'       |                 |
| GAPDH         | Forward | 5'- GTGGACCTGACCTGCCGTCT -3'      | 152 bp          |
|               | Reverse | 5'- GGAGGAGTGGGTGTCGCTGT -3'      |                 |

**S3 Table. Set of antibodies used for iPSC, IPSC-derived -cardiomyocytes and -keratinocytes.**

| Protein target                   | Dilution used |        | Manufacturer,<br>number                          | Catalog   |
|----------------------------------|---------------|--------|--------------------------------------------------|-----------|
|                                  | IF            | FC     |                                                  |           |
| OCT4                             | Kit           | Kit    |                                                  |           |
| NANOG                            | Kit           | Kit    | Merck                                            | Millipore |
| SOX2                             | -             | Kit    | SCR078                                           | Sigma,    |
| TRA-1-60                         | Kit           | -      |                                                  |           |
| Cardiac troponin T (TNNT2)       | 1:200         | 1:3500 | Fritzgerald, 20R-3024                            |           |
| Myosin (MYH7)                    | 1:500         | -      | Interprise, DSHB-A4.951                          |           |
| Alfa-actinin (ACTN2)             | 1:500         | 1:1000 | Abcam, ab9465                                    |           |
| Fetal cardiac troponin I (TNNI1) | 1:500         | 1:1000 | Thermo Fisher, 701585                            |           |
| Adult cardiac troponin I (TNNI3) | 1:30          | 1:50   | Interprise, DSHB-T-I4                            |           |
| NKX2.5                           | 1:100         | 1:100  | Cell Signaling, 8792S                            |           |
| Keratin 10                       | 1:100         | -      | AbCam, ab9026                                    |           |
| Keratin 14                       | 1:1000        | 1:1000 | AbCam, ab192055 (FC)<br>Biolegend, PBR-155P (IF) |           |
| Ki67                             | 1:50          | -      | AbCam, ab15580                                   |           |
| p63                              | 1:50          | -      | Zeta Corporation, Z2003L                         |           |
| integrin alpha-6 (CD49f)         | 1:100         | -      | eBioscience/14-0495-82                           |           |
| integrin beta-4 (CD104)          | 1:100         | -      | BD Biosystems, BD555721                          |           |
| FOXA2                            | 1:300         | 1:2000 | Abcam, ab60721                                   |           |
| CXCR4                            | 1:200         | -      | Abcam, ab124824                                  |           |

**S4 Table. Cell confluence data by previous software**

| Cell plate | Image  | Visual confluence % | Confluence by IJ previous version % |
|------------|--------|---------------------|-------------------------------------|
| 1          | 640111 | 100                 | 82.622                              |
|            | 640112 | 100                 | 79.351                              |
|            | 640113 | 100                 | 81.033                              |
|            | 640114 | 100                 | 80.051                              |
|            | 640115 | 100                 | 82.272                              |
| 2          | 640211 | 100                 | 81.495                              |
|            | 640212 | 100                 | 80.613                              |
|            | 640213 | 100                 | 80.46                               |
|            | 640214 | 100                 | 81.035                              |
|            | 640215 | 100                 | 81.612                              |
| 3          | 640311 | 100                 | 82.874                              |
|            | 640312 | 100                 | 84.269                              |
|            | 640313 | 100                 | 82.688                              |
|            | 640314 | 100                 | 81.394                              |
|            | 640315 | 100                 | 83.833                              |

**S5 Table. Cell confluence data after modifications in the algorithm**

| <b>Pre. Frab. Confluence<br/>%</b> | <b>Confluence by IJ previous version<br/>%</b> | <b>CellCountAnalys<br/>er</b> |
|------------------------------------|------------------------------------------------|-------------------------------|
| 0                                  | 1.503                                          | -0.89                         |
| 5                                  | 6.346                                          | 4.90                          |
| 10                                 | 10.457                                         | 9.81                          |
| 15                                 | 14.674                                         | 14.84                         |
| 20                                 | 18.968                                         | 19.97                         |
| 25                                 | 23.234                                         | 25.07                         |
| 30                                 | 27.561                                         | 30.24                         |
| 35                                 | 31.772                                         | 35.27                         |
| 40                                 | 36.11                                          | 40.45                         |
| 45                                 | 40.243                                         | 45.38                         |
| 50                                 | 44.24                                          | 50.16                         |
| 55                                 | 48.481                                         | 55.22                         |
| 60                                 | 52.623                                         | 60.17                         |
| 65                                 | 56.905                                         | 65.29                         |
| 70                                 | 61.082                                         | 70.28                         |
| 75                                 | 65.145                                         | 75.13                         |
| 80                                 | 69.25                                          | 80.03                         |
| 85                                 | 73.476                                         | 85.08                         |
| 90                                 | 77.437                                         | 89.81                         |
| 95                                 | 81.366                                         | 94.50                         |
| 100                                | 85.348                                         | 99.26                         |

## REFERENCES

1. Chou BK, Mali P, Huang X, Ye Z, Dowey SN, Resar LMS, et al. Efficient human iPS cell derivation by a non-integrating plasmid from blood cells with unique epigenetic and gene expression signatures. *Cell Res.* 2011;21(3):518–29.
2. Lian X, Zhang J, Azarin SM, Zhu K, Hazeltine LB, Bao X, et al. Directed cardiomyocyte differentiation from human pluripotent stem cells by modulating Wnt/ $\beta$ -catenin signaling under fully defined conditions. *Nat Protoc.* 2013;8(1):162–75.
3. Wang X, Yang P. In vitro differentiation of mouse embryonic stem (mES) cells using the hanging drop method. *J Vis Exp.* 2008;(17):825.
4. Itoh M, Kiuru M, Cairo MS, Christiano AM. Generation of keratinocytes from normal and recessive dystrophic epidermolysis bullosa-induced pluripotent stem cells. *Proc Natl Acad Sci U S A.* 2011;108(21):8797–802.
5. Jaccard N, Griffin LD, Keser A, Macown RJ, Super A, Veraitch FS, et al. Automated method for the rapid and precise estimation of adherent cell culture characteristics from phase contrast microscopy images. *Biotechnol Bioeng.* 2014;111(3):504–17.
6. Venter C, Niesler CU. Rapid quantification of cellular proliferation and migration using ImageJ. *BioTechniques.* 2019;66(2):99–102.
7. Georg M, Fernández-Cabada T, Bourguignon N, Karp P, Peñaherrera AB, Helguera G, et al. Development of image analysis software for quantification of viable cells in microchips. *PLoS ONE.* 2018;13(3):e0193605.
8. Busschots S, O'Toole S, O'Leary JJ, Stordal B. Non-invasive and non-destructive measurements of confluence in cultured adherent cell lines. *MethodsX.* 2015;2:8–13.
